# Supplementary material for: Characterization of MED12, HMGA2, and FH alterations reveals molecular variability in uterine smooth muscle tumors
Source: Springer Nature journal article supplement (doi:10.1186/s12943-017-0672-1), 2017-06-07
Supplement: MOESM3 [file 12346906]

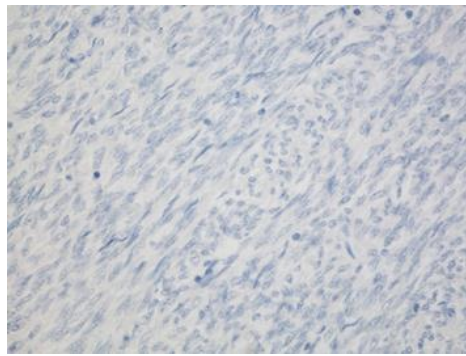

**HMGA2 -**

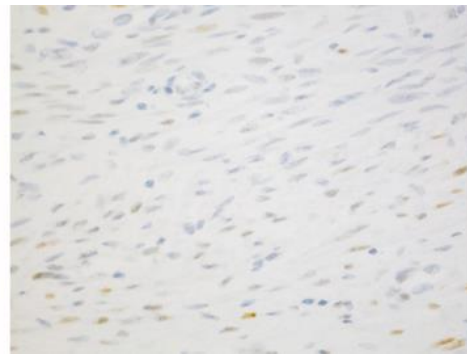

**HMGA2 (+)**

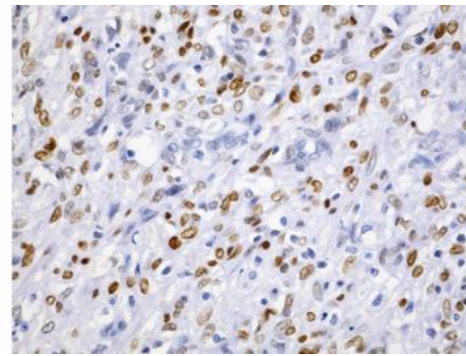

**HMGA2 +**

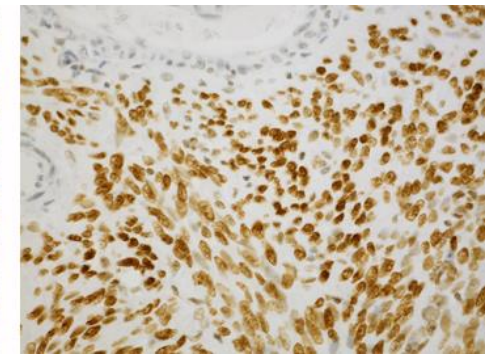

**HMGA2 ++**

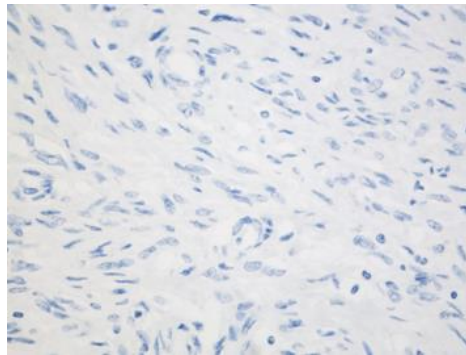

**2SC -**

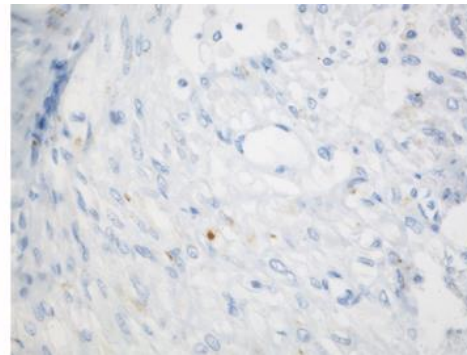

**2SC (+)**

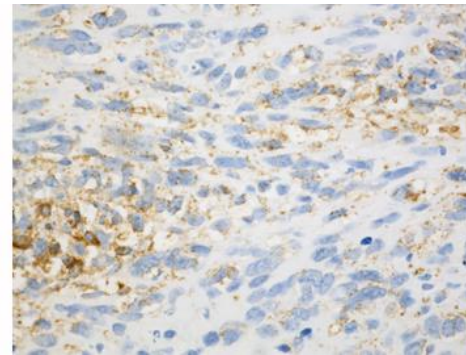

**2SC +**

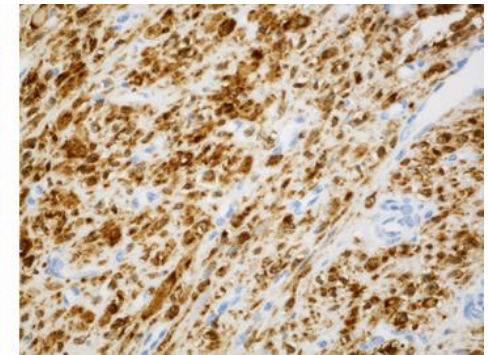

**2SC ++**

**Figure S2. Scoring of HMGA2 and 2SC antibody stainings.** Representative figures of uterine smooth muscle tumors showing different intensities of the immunoreaction for HMGA2 and 2SC (-/(+)/(+/++)). Antibody stainings are shown with  $\times 40$  magnification.
