# Supplementary material for: Characterization of MED12, HMGA2, and FH alterations reveals molecular variability in uterine smooth muscle tumors
Source: Springer Nature journal article supplement (doi:10.1186/s12943-017-0672-1), 2017-06-07
Supplement: MOESM4 [file 12346906]

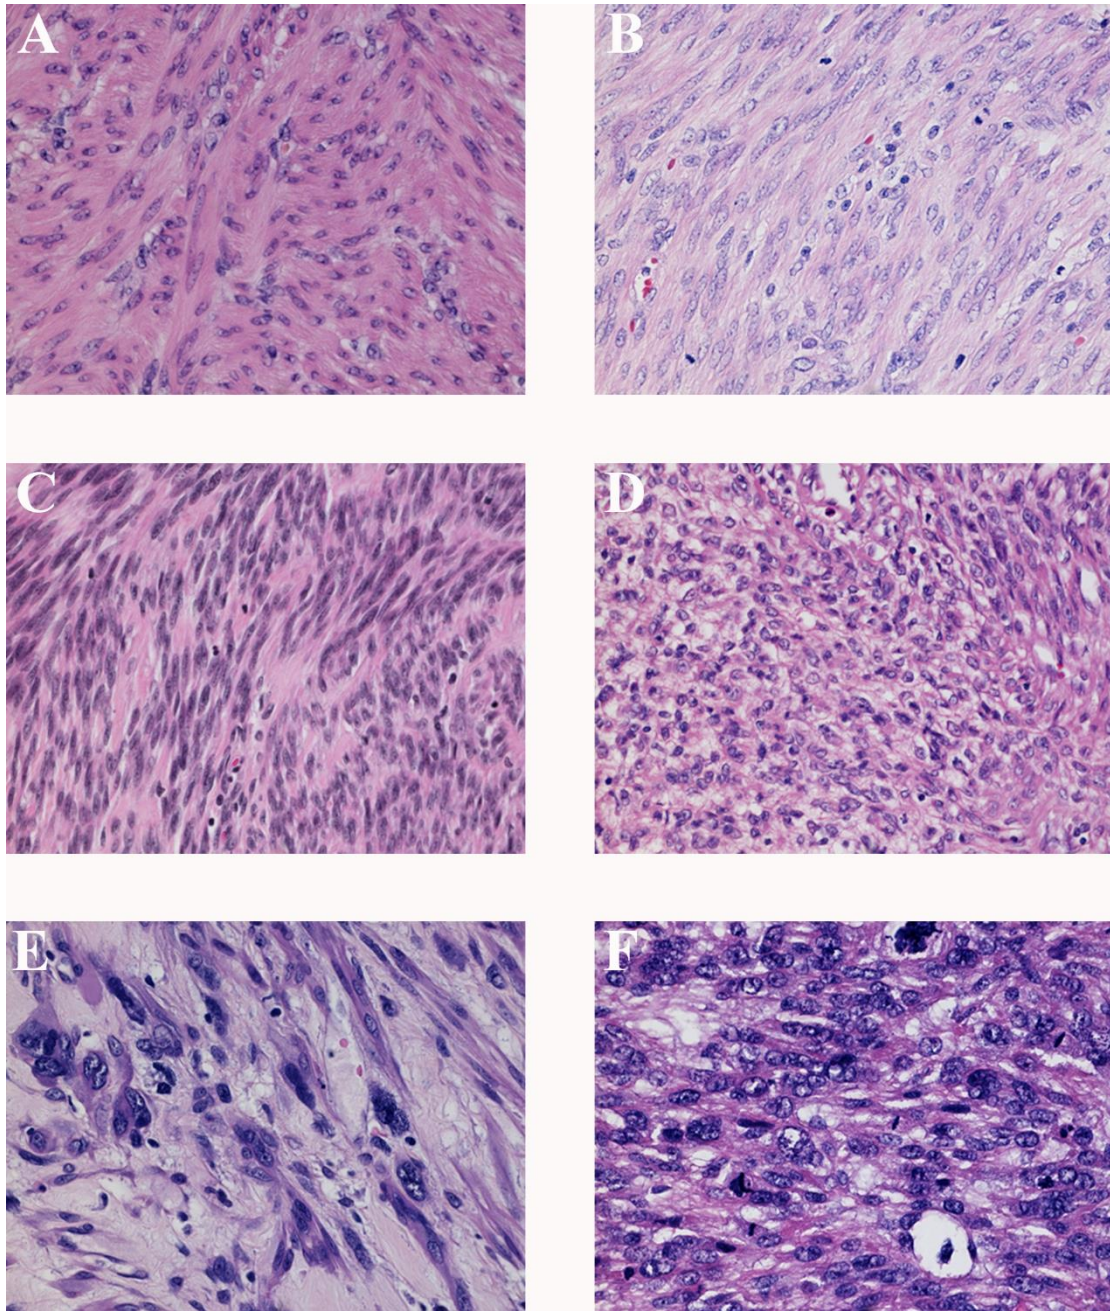

**Figure S3. Uterine smooth muscle tumor subtypes.** Representative figures of A) conventional, B) mitotically active, C) cellular, D) highly cellular leiomyomas, E) leiomyomas with bizarre nuclei, and F) leiomyosarcomas. HE-stainings are shown with  $\times 40$  magnification.
